# Supplementary material for: Hierarchical CoMoO4@Co3O4 nanocomposites on an ordered macro-porous electrode plate as a multi-dimensional electrode in high-performance supercapacitors
Source: Royal Society of Chemistry journal article supplement (doi:10.1039/c7ta04981a), 2017-01-01
Supplement: c7ta04981a1.pdf [file c7ta04981a1.pdf]

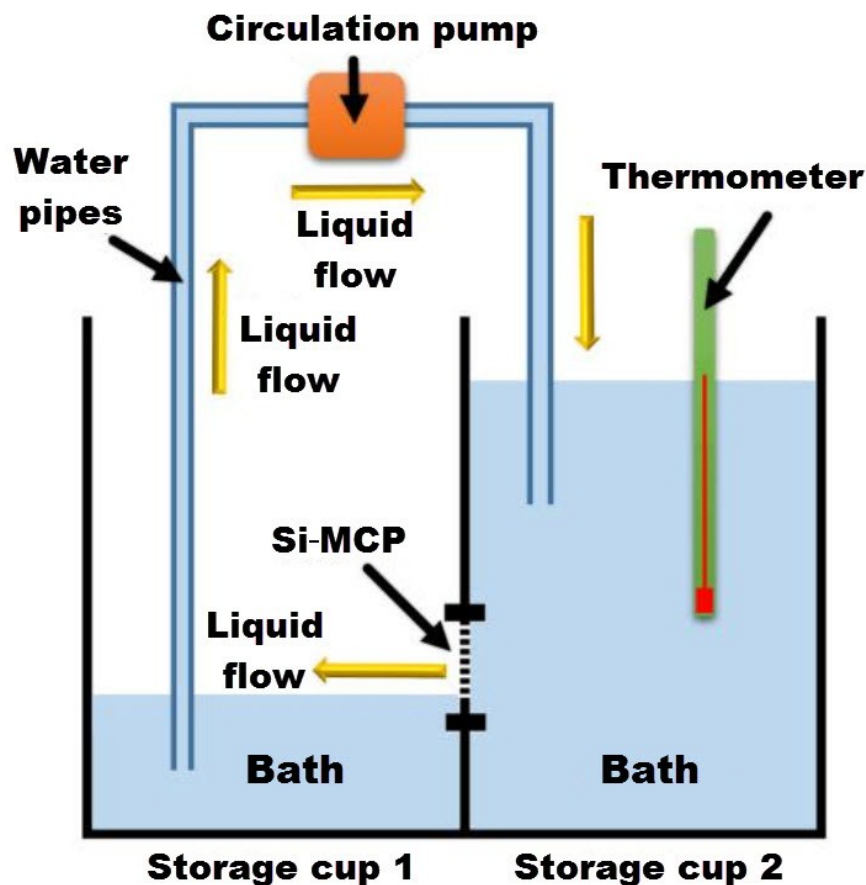

**Fig. S1** The schematic diagram of the device for the liquid flow plating method and the way to deposit a dense nickel layer on the surface and sidewall of Si-MCP. Under the action of gravity and water pump, the deposition fluid flows continuously through the surface and interior of the Si-MCP that obtain the OMEP with a dense and uniform nickel layer.

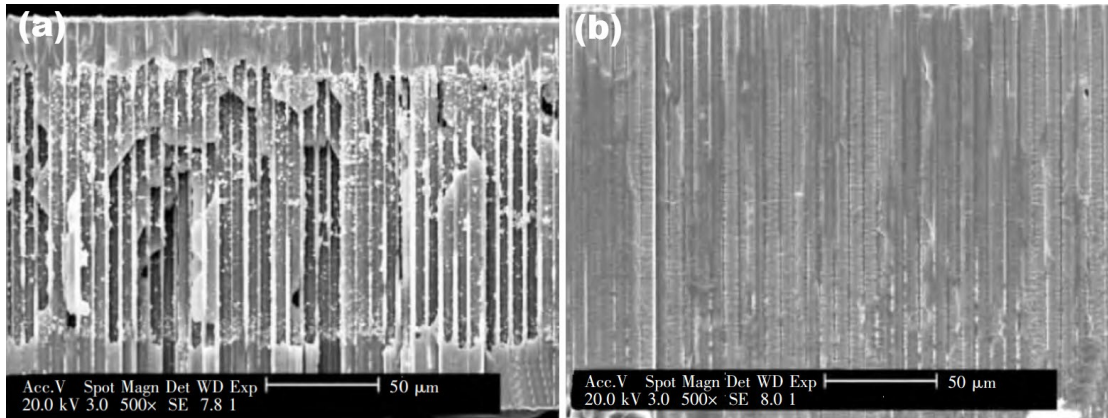

**Fig. S2** (a) The nickel layer fabricated through the traditional electroless plating method; (b) The nickel layer fabricated through the liquid flow plating method.

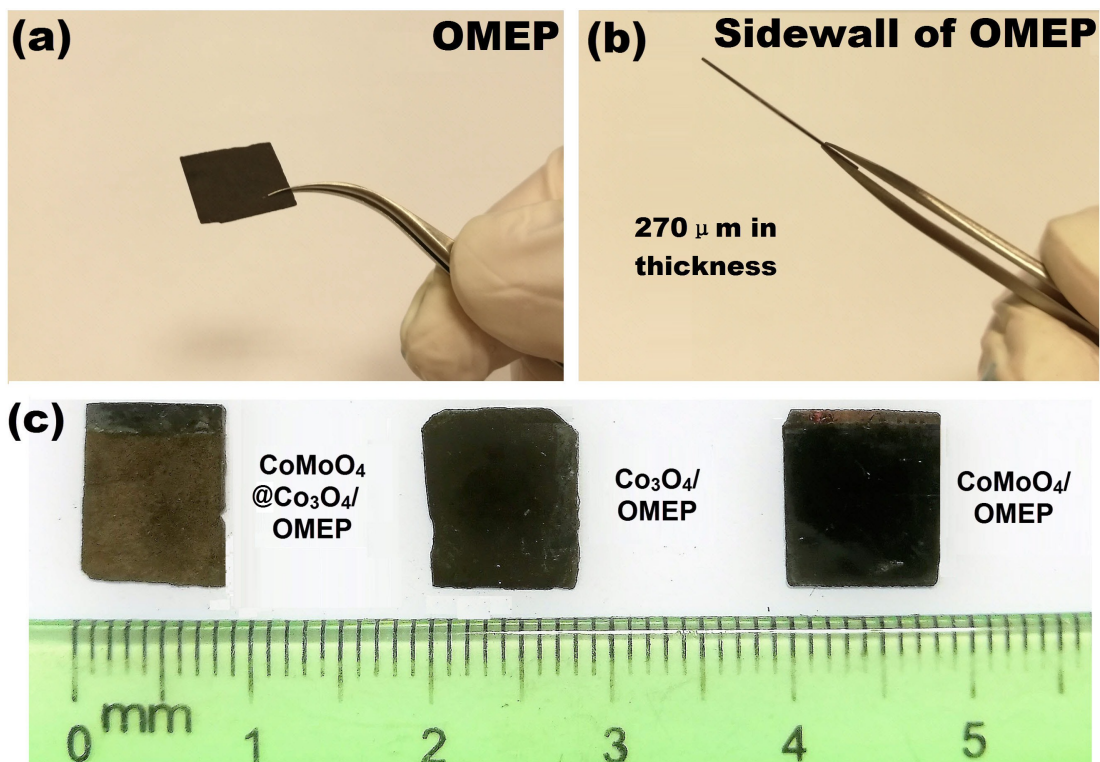

**Fig. S3** (a) Front view of OMEP; (b) Sectional view of OMEP; (c) Samples based on OMEP after the electrochemistry tests (from left to right: CoMoO<sub>4</sub>@Co<sub>3</sub>O<sub>4</sub>/OMEP, Co<sub>3</sub>O<sub>4</sub>/OMEP, and CoMoO<sub>4</sub>/OMEP).

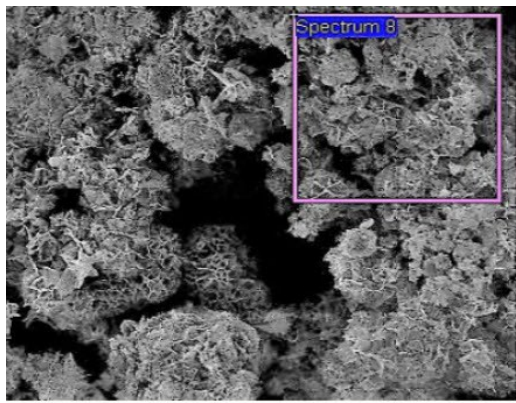

| Element | Weight% | Atomic% |
|---------|---------|---------|
| O K     | 20.65   | 50.77   |
| Co K    | 52.52   | 3.06    |
| Ni K    | 12.19   | 8.17    |
| Mo L    | 14.65   | 6.01    |
| Totals  | 100.00  |         |

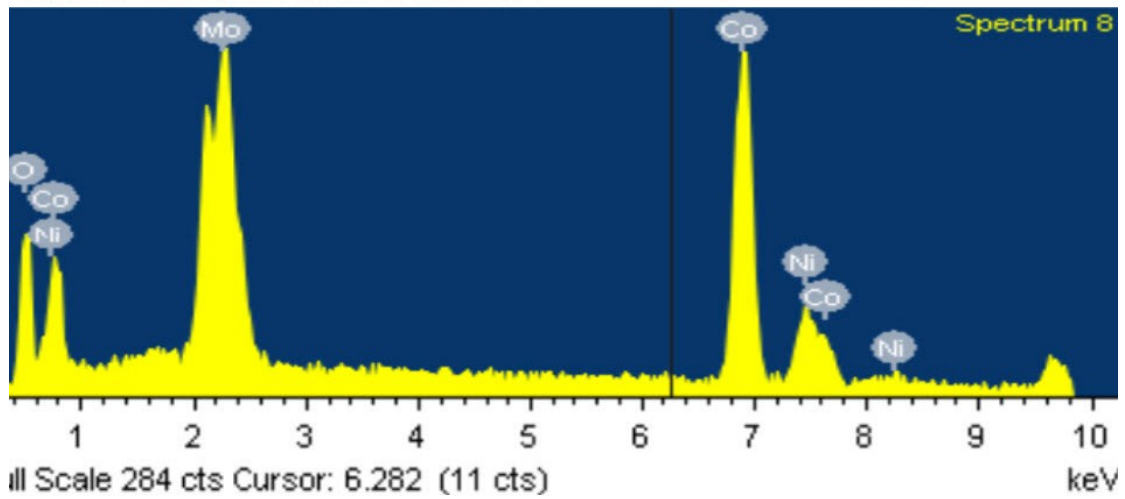

**Fig. S4** EDS spectrum of the  $\text{CoMoO}_4@\text{Co}_3\text{O}_4/\text{OMEP}$  electrode.

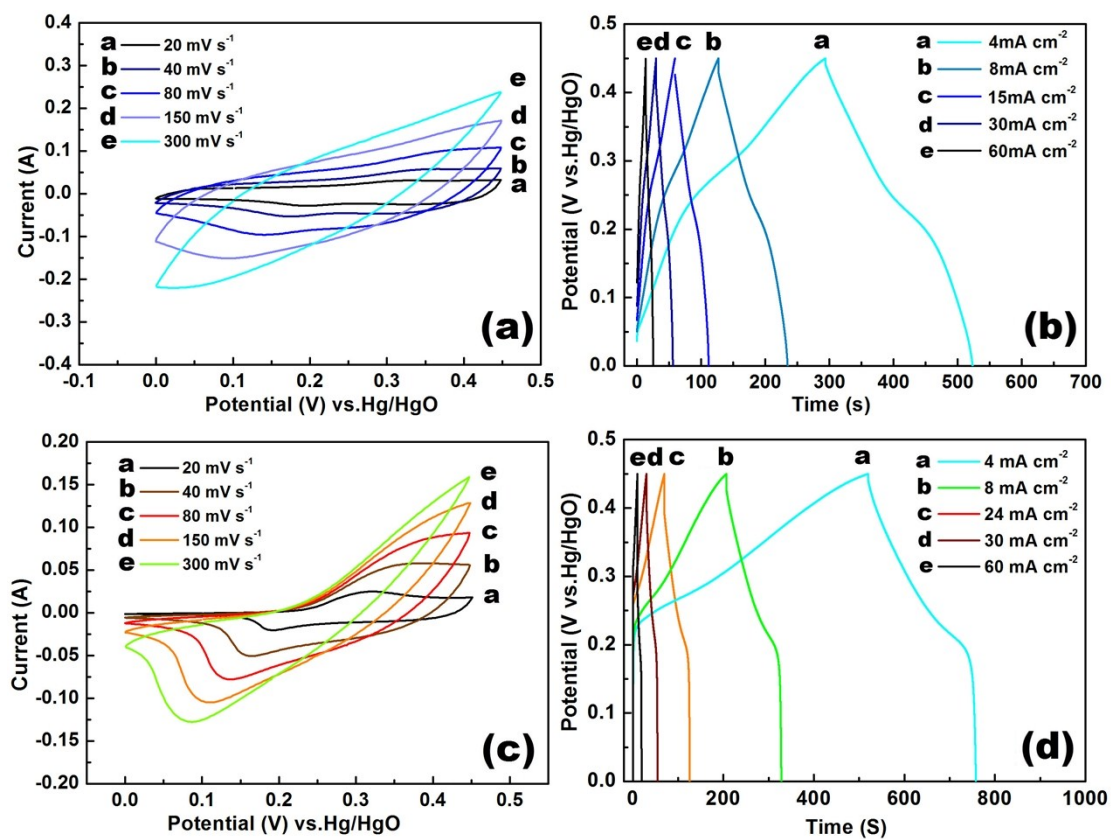

**Fig. S5** (a) CV curves of CoMoO<sub>4</sub>/OMEP at different scanning rate; (b) First discharge curves of CoMoO<sub>4</sub>/OMEP at different current density; (c) CV curves of Co<sub>3</sub>O<sub>4</sub>/OMEP at different scanning rates; (d) First discharge curves of Co<sub>3</sub>O<sub>4</sub>/OMEP at different current densities.

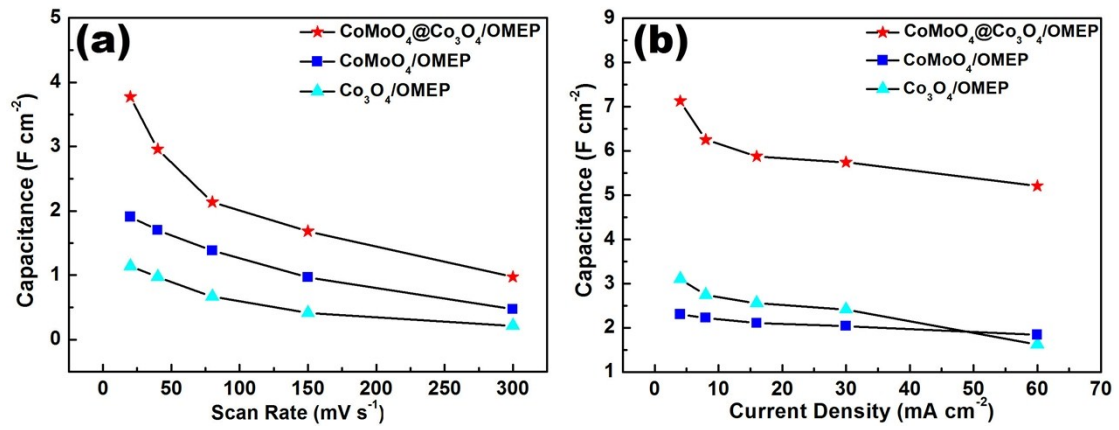

**Fig. S6** (a) Variation of the interfacial capacitances of the CoMoO<sub>4</sub>@Co<sub>3</sub>O<sub>4</sub>/OMEP, CoMoO<sub>4</sub>/OMEP, Co<sub>3</sub>O<sub>4</sub>/OMEP electrodes at different scanning rates; (b) Variation of the interfacial capacitances of the CoMoO<sub>4</sub>@Co<sub>3</sub>O<sub>4</sub>/OMEP, CoMoO<sub>4</sub>/OMEP, Co<sub>3</sub>O<sub>4</sub>/OMEP electrodes at different current densities.

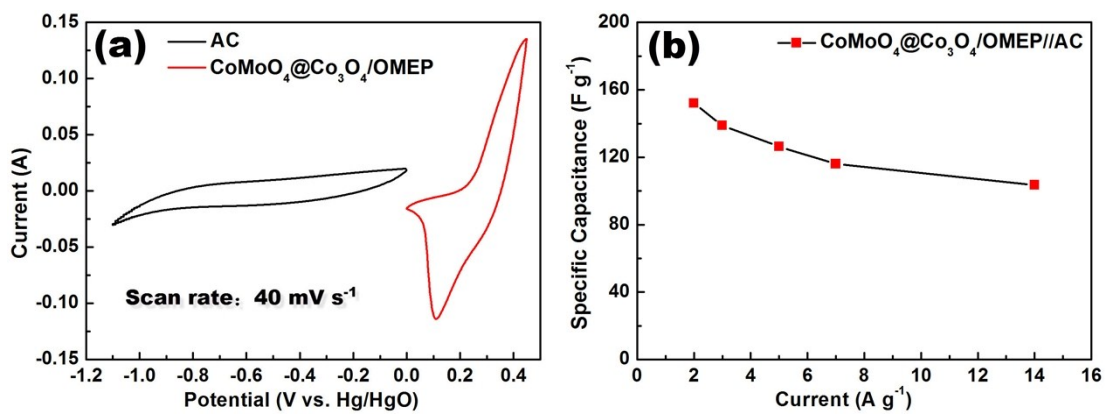

**Fig. S7** (a) CV curves of the composite CoMoO<sub>4</sub>@Co<sub>3</sub>O<sub>4</sub>/OMEF (0 to 0.45 V) and AC (-1.1 to 0 V) at a scanning rate of 40 mV s<sup>-1</sup>; (b) Specific capacitance values of the CoMoO<sub>4</sub>@Co<sub>3</sub>O<sub>4</sub>/OMEF//AC asymmetrical supercapacitor as a function of current density.
